# Supplementary material
Source: PubMed Central journal article supplement (PMC6283697)

# Comparison of Observed and Expected Survival in DM1-Unknown Parents

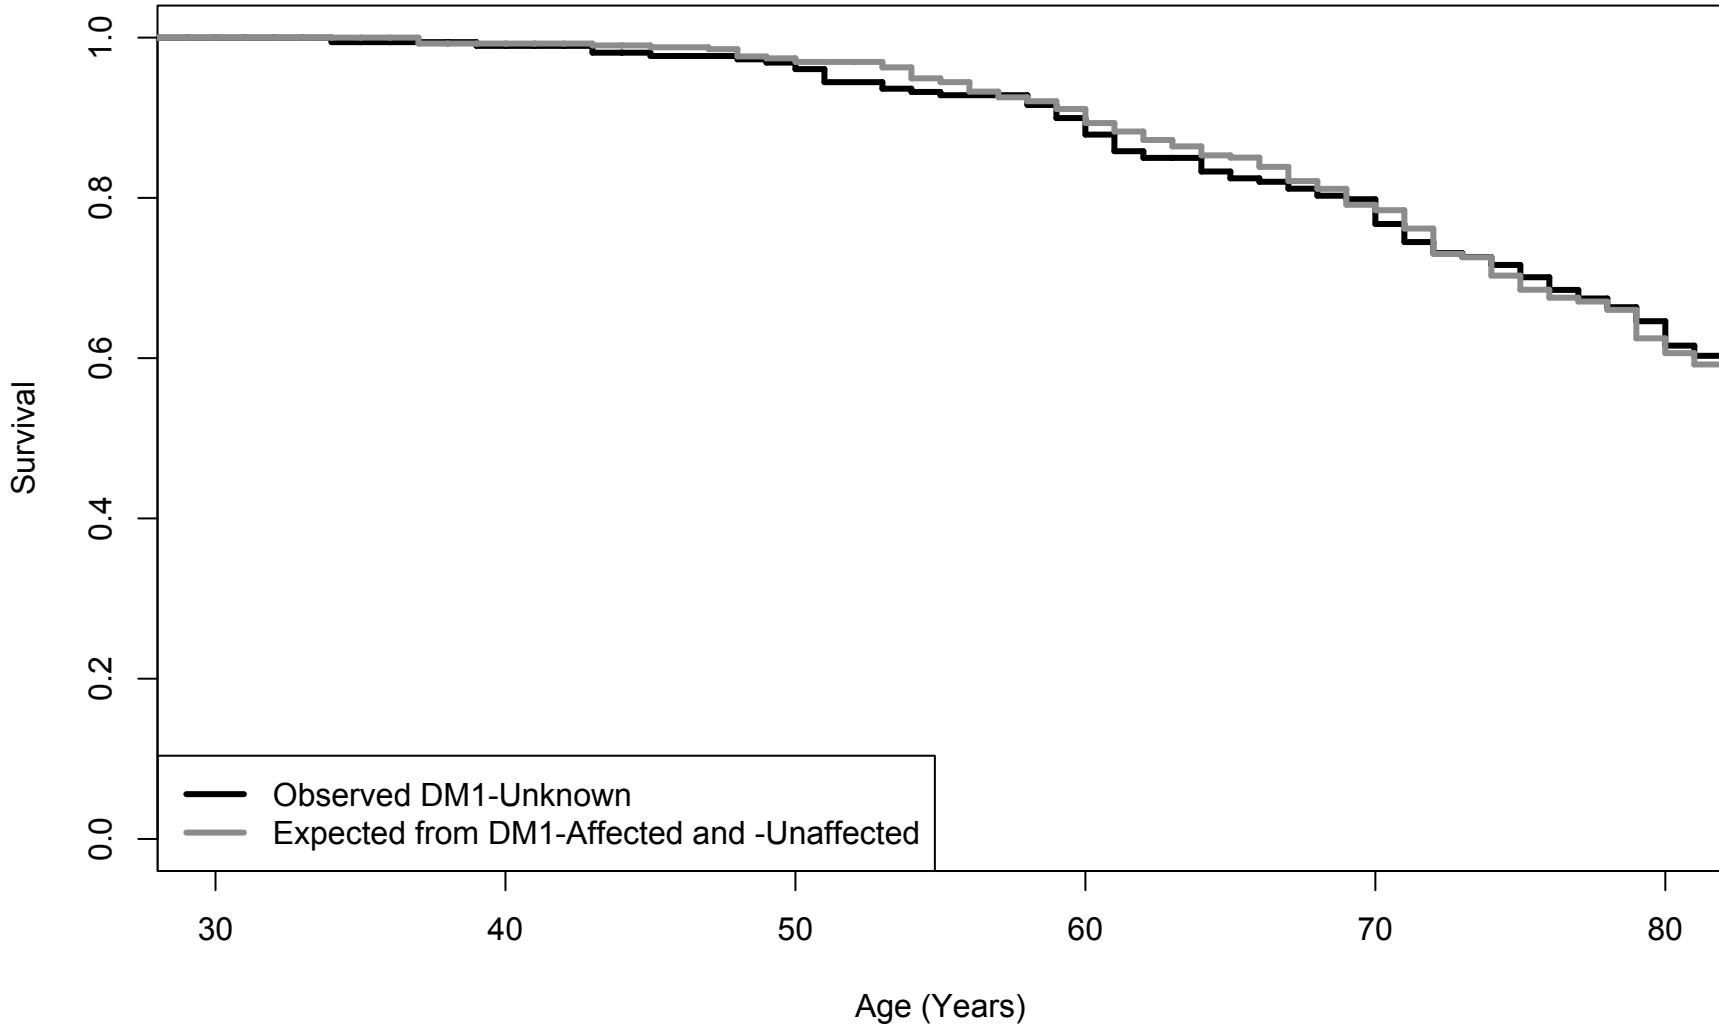

Supplement: NIHMS983206-supplement-Supp_FigS1.pdf [file NIHMS983206-supplement-Supp_FigS1.pdf]
